# Supplementary material for: Enhancing the differentiation of specific genotypes in Mycobacterium tuberculosis population
Source: PubMed Central journal article supplement (PMC6884525; doi:10.1038/s41598-019-54393-7), 2019-11-29
Supplement: 41598_2019_54393_MOESM1_ESM.pdf [file 41598_2019_54393_MOESM1_ESM.pdf]

**Enhancing the differentiation of specific genotypes in**  
***Mycobacterium tuberculosis* population**

Shima Hadifar <sup>#</sup>, Mansour Kargarpour Kamakoli <sup>#</sup>, Abolfazl Fateh, Seyed Davar Siadat,  
Farzam Vaziri <sup>\*</sup>

<sup>#</sup>These authors contributed equally to this work.

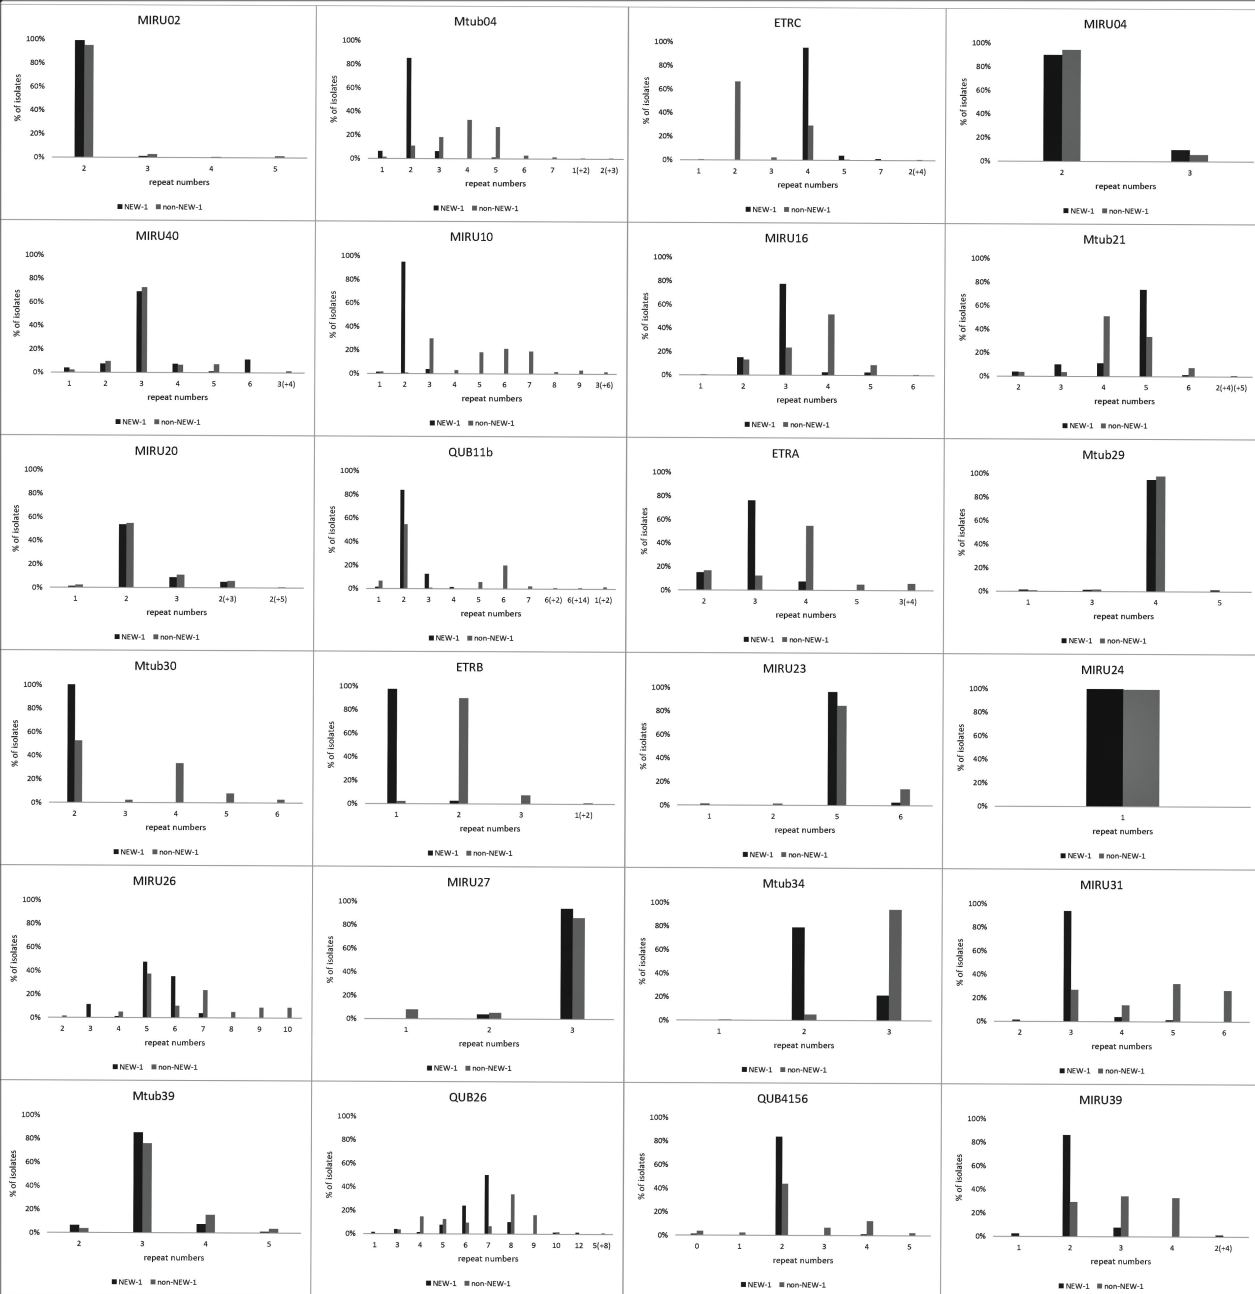

Supplementary Figure S1. Allelic profile of the MIRU-VNTR loci between NEW-1 (black) and non-NEW-1 (gray) strains.

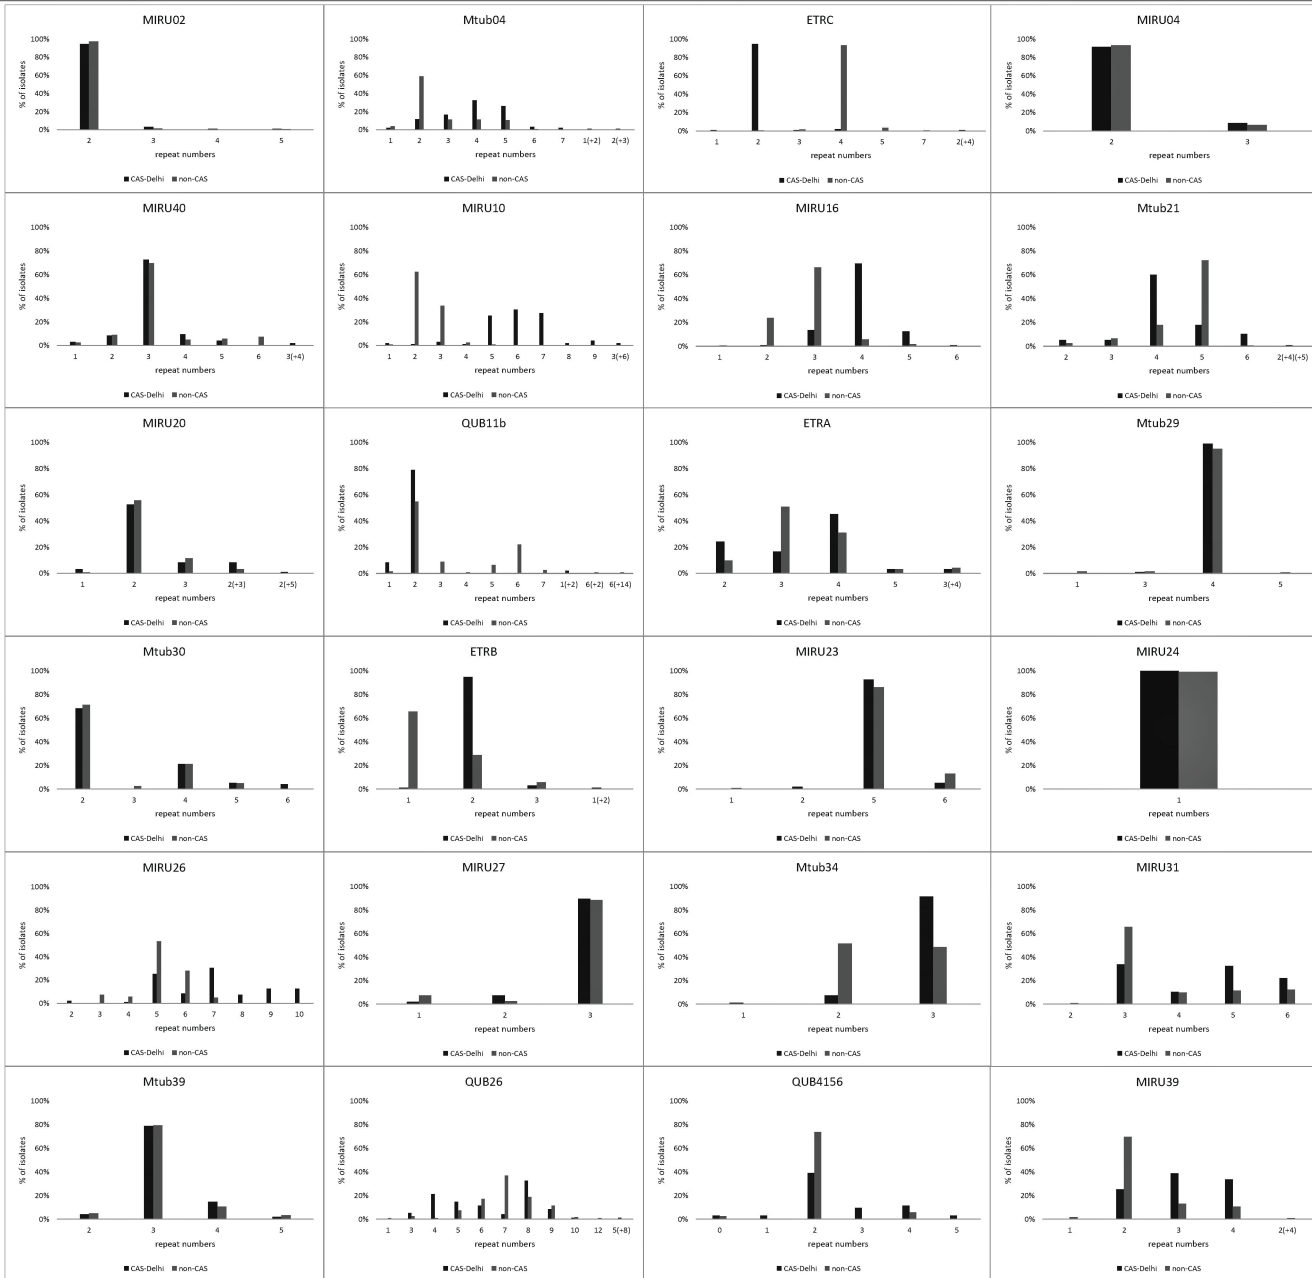

## Beijing and non-Beijing

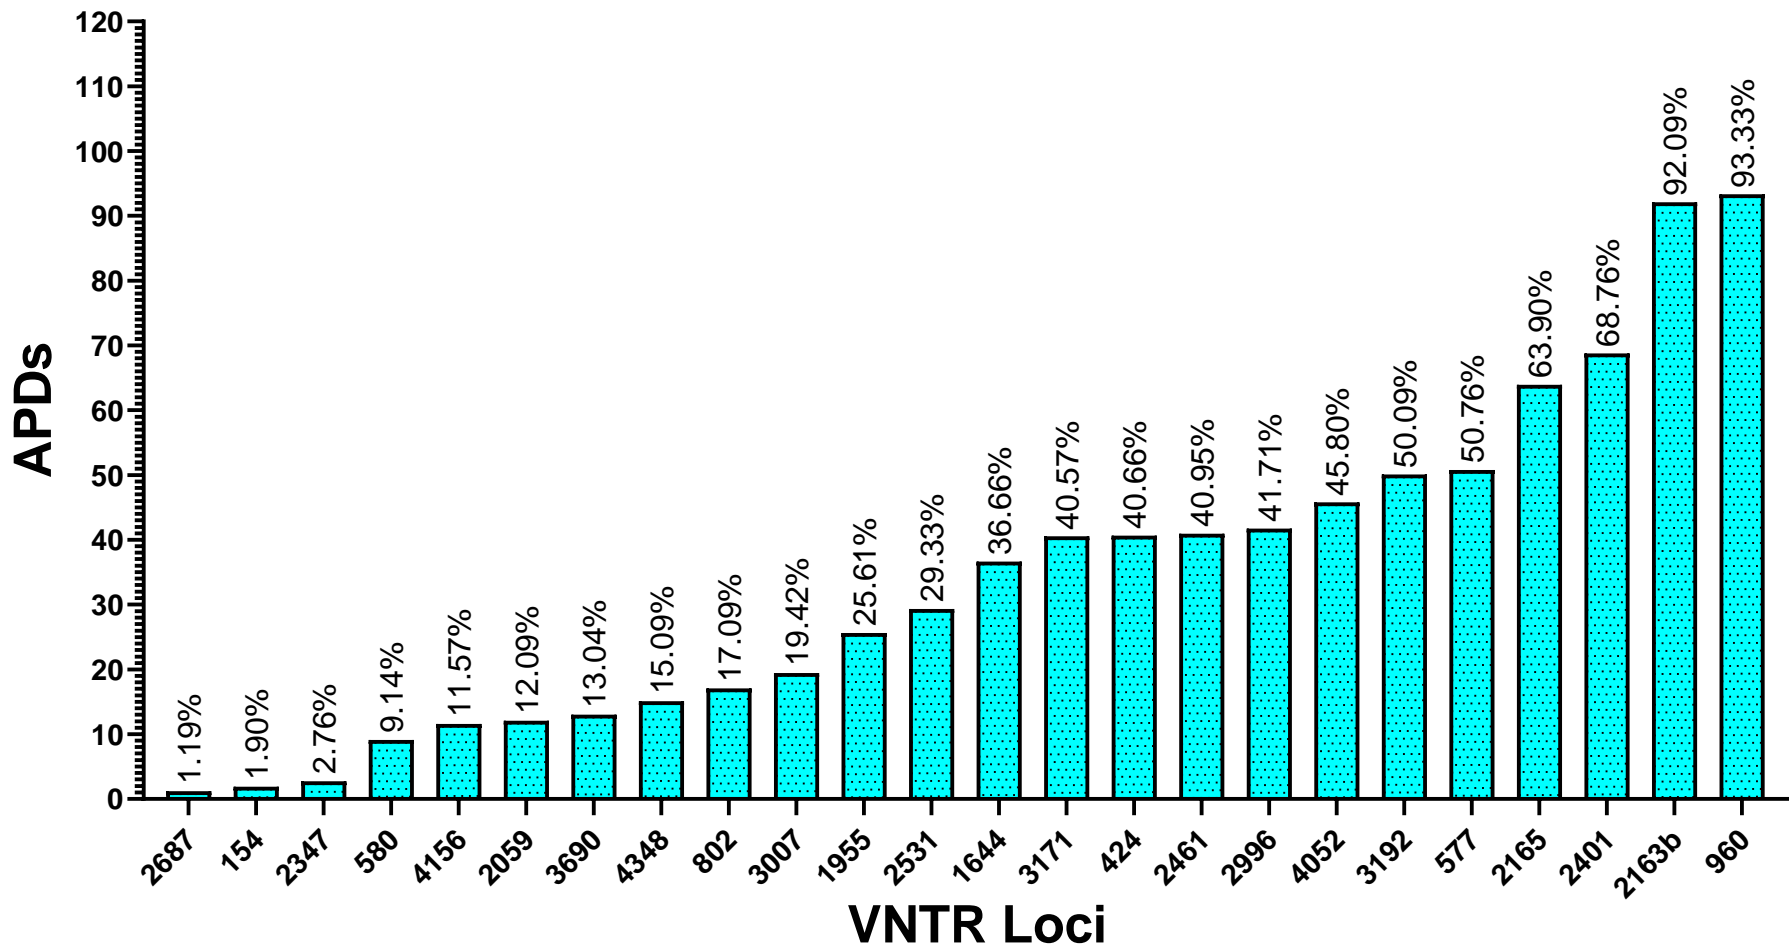

Supplementary Figures S3. The APDs of 24 VNTR loci between Beijing and non-Beijing strains.
